# Supplementary material
Source: Springer Nature journal article supplement (https://www.springermedizin.de/resource/supplementary/12916_2012_646_MOESM2_ESM.pdf/9598678)

Risk assessment tool to estimate outcome risk

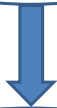

Application of treatment evidence to outcome risks

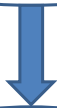

Benefit harm assessment to define treatment thresholds according to outcome risks

Evidence about treatment effects on benefit and harm outcomes

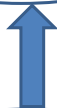

Patient preferences

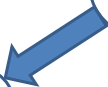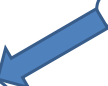

Supplement: MOESM2 [file 9598678]
